# Supplementary material for: Systemic inflammation response index (SIRI) predicts prognosis in hepatocellular carcinoma patients
Source: PubMed Central journal article supplement (PMC5471025; doi:10.18632/oncotarget.16865), 2017-04-05
Supplement: oncotarget-08-34954-s001.pdf [file oncotarget-08-34954-s001.pdf]

## Systemic inflammation response index (SIRI) predicts prognosis in hepatocellular carcinoma patients

### Supplementary Materials

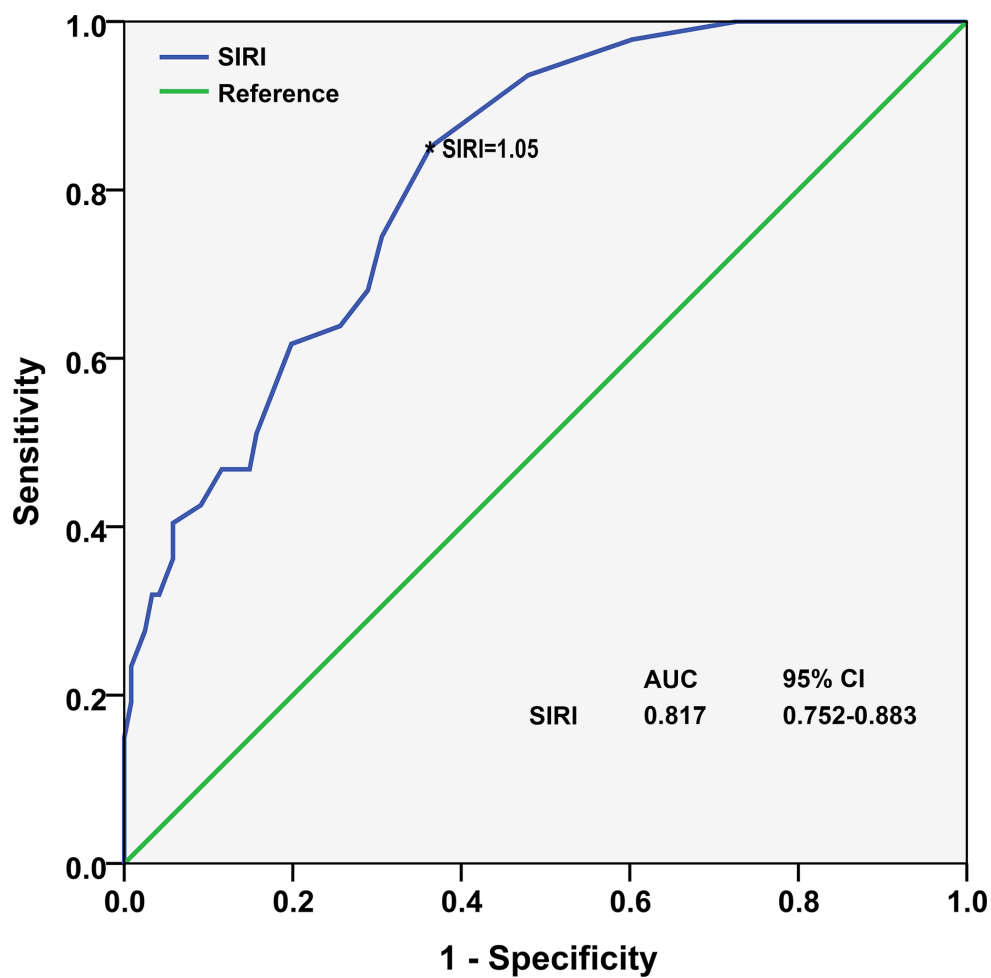

**Supplementary Figure 1: The optimal cutoff point for the SIRI was determined by ROC analysis in the training cohort.** The Youden index (sensitivity+specificity-1) was used to select a threshold for estimating sensitivity and specificity.

**Supplementary Table 1: Baseline characteristics in different SIRI group of validation cohort**

| Variable                  | SIRI < 1.05   | SIRI ≥ 1.05   | P value |
|---------------------------|---------------|---------------|---------|
| No. of patients           | 105           | 78            |         |
| Age, years, Mean ± SD     | 53.8 ± 11.6   | 53.7 ± 9.0    | 0.970   |
| Gender                    |               |               | 0.103   |
| Male                      | 85            | 70            |         |
| Female                    | 20            | 8             |         |
| Hepatitis B, <i>n</i> (%) | 92 (88)       | 64 (82)       | 0.295   |
| Cirrhosis (no vs yes)     | 11 vs 94      | 9 vs 69       | 0.820   |
| Child-Pugh                |               |               | 0.481   |
| A                         | 95            | 68            |         |
| B                         | 10            | 10            |         |
| AFP                       |               |               | 0.015   |
| < 200 ng/ml               | 53            | 26            |         |
| ≥ 200 ng/ml               | 52            | 52            |         |
| BCLC                      |               |               | 0.022   |
| B                         | 65            | 35            |         |
| C                         | 40            | 43            |         |
| TBIL (umol/L), mean ± SD  | 18.3 ± 14.0   | 18.0 ± 9.2    | 0.847   |
| DBIL (umol/L), mean ± SD  | 6.9 ± 8.5     | 7.1 ± 5.1     | 0.843   |
| ALT (IU/L), mean ± SD     | 41.4 ± 38.5   | 53.9 ± 60.6   | 0.092   |
| AST (IU/L), mean ± SD     | 48.5 ± 46.9   | 78.0 ± 79.0   | 0.004   |
| GGT (IU/L), mean ± SD     | 124.6 ± 124.5 | 232.6 ± 243.2 | 0.001   |
| LDH (IU/L), mean ± SD     | 202.1 ± 90.4  | 286.1 ± 185.2 | 0.000   |
| ALP (IU/L), mean ± SD     | 121.9 ± 79.9  | 174.4 ± 136.5 | 0.003   |
| ALB (IU/L), mean ± SD     | 40.1 ± 4.4    | 37.8 ± 4.8    | 0.002   |
